# Supplementary material
Source: publisher figshare collection journal article supplement (https://frontiersin.figshare.com/ndownloader/files/22688186)
Supplement: Supplementary file 1 [file 22688186]

***Appendix B. Tables including impacts of climate change, key affected decisions, and study locations***

Table 1. Expected changes in climate, its impacts and key decisions affected in the olive cropping systems in

the southern areas and/or lower latitudes of northern areas

| Expected changes in climate | Expected impacts | Key decisions affected | Study location |
| --- | --- | --- | --- |
| ***Water stress*** | | | |
| Increase in daily temperatureabove the maximum (40-450C) supported by olive trees  (Proietti and Regni, 2018) | Reduction of Mediterranean  cultivation areas  (Quiroga and Suárez, 2016; Proietti and Regni, 2018) | Irrigation  (Proietti and Regni, 2018) | The lower latitudes of northern Mediterranean countries (France, Portugal) and/or the southern Mediterranean countries (Cyprus, Greece, Italy, Malta, Spain) (Proietti and Regni, 2018) |
| Decrease in yields (Ronchail *et al*., 2014; Proietti and Regni, 2018) | Water stress reducing measures (careful control of weeds, low plant density, adequate intensity of pruning; Proietti and Regni, 2018) | Sierra Mágina (37.71° N ), Jaén Province, in N-E Andalusia (Spain) (Ronchail *et al.,* 2014) |
| Uneven increase in temperature across regions (Iglesias *et al.,* 2010; *Ponti et al*., 2014) | Highly variable yields (Iglesias *et al*., 2010; Ponti *et al*., 2014) | Irrigation and development of skills to quantify climate risk  (Iglesias *et al.,* 2010) | Murcia(38.00°N); Cordoba 37.85°N (Iglesias *et al.,* 2010) |
| Euro- and non-European Mediterranean countries (Ponti *et al.,* 2014) |
| Variation in annual temperature and rainfall amount, climatic aridity (Ponti *et al*., 2014;  Coscarelli *et al.,* 2016) | Desertification of cultivation areas (Ponti *et al*., 2014; Coscarelli *et al.,* 2016) | Irrigation  (Ponti *et al*., 2014;  Coscarelli *et al.,* 2016) | Crotone province (39.13° N), Italy (Coscarelli *et al.*, 2016) |
| Euro- and non-European Mediterranean countries (Ponti *et al.,* 2014) |
| Decrease in annual rainfall below minimum water requirements of olive trees (< 350-400 mm year-1; Tombesi *et al*., 2007;  Ponti *et al*., 2014) | The lower latitudes of northern Mediterranean countries (France, Portugal) and/or the southern Mediterranean countries (Cyprus, Greece, Italy, Malta, Spain) (Tombesi *et al.,* 2007) |
| Decreases in rainfall in spring and summer below the water requirements of the olive trees (Ronchail *et al.,* 2014) | Decrease in yields (Ronchail *et al.,* 2014) | Additional water stress reducing measures (careful control of weeds, low plant density, adequate intensity of pruning )  (Proietti and Regni, 2018) | The lower latitudes of northern Mediterranean countries (France, Portugal) and/or the southern Mediterranean countries (Cyprus, Greece, Italy, Malta, Spain) (Proietti and Regni, 2018) |
| Sierra Mágina (37.71° N ), Jaén Province, in N-E Andalusia (Spain) (Ronchail *et al.,* 2014) |
| Uneven distribution and reduced amount of rainfall (during fruit setting and development stages; Proietti and Regni, 2018) | Limited fruit development (Proietti and Regni, 2018) | Irrigation during the vegetative period (annual rainfall > 700 mm)  (Proietti and Regni, 2018) | The lower latitudes of northern Mediterranean countries (France, Portugal) and/or the southern Mediterranean countries (Cyprus, Greece, Italy, Malta, Spain) (Proietti and Regni, 2018) |
| Occurrence of prolonged and/or repeated water stress (Proietti and Regni, 2018) | Reduced olive oil quality (“dry-wood” sensorial defect) (Proietti and Regni, 2018) | Irrigation during vegetative and productive period (annual rainfall 500 - 700 mm)  (Proietti and Regni, 2018) | The lower latitudes of northern Mediterranean countries (France, Portugal) and/or the southern Mediterranean countries (Cyprus, Greece, Italy, Malta, Spain) (Proietti and Regni, 2018) |
| Irrigation + additional water stress reducing measures (annual rainfall 400 - 500 mm)  (Proietti and Regni, 2018) |
| Estimate water needs of olive trees (HydSOS, 2019) | Cordoba (37.85°N) (HydSOS, 2019) |
| ***Development and yield*** | | | |
| Increases in daily temperature above the maximum supported by olive trees during the fruit ripening stage (Tombesi *et al.,* 2007) | Reduced olive oil’s resistance to oxidation (Tombesi *et al.,* 2007) | Earlier harvest date (Tombesi *et al.,* 2007) | The lower latitudes of northern Mediterranean countries (France, Portugal) and/or the southern Mediterranean countries (Cyprus, Greece, Italy, Malta, Spain) (Tombesi *et al.*, 2007) |
| Prolonged increases of temperature above the maximum supported by olive trees  (Proietti and Regni, 2018) | Limited vegetative activity (Proietti and Regni, 2018) | Adjusted shape of olive tree (Proietti and Regni, 2018) | The lower latitudes of northern Mediterranean countries (France, Portugal) and/or the southern Mediterranean countries (Cyprus, Greece, Italy, Malta, Spain) (Proietti and Regni, 2018) |
| Uneven increase in temperature across regions  (Iglesias *et al.,* 2010;  *Ponti et al*., 2014) | Highly variable yields (Iglesias *et al.,* 2010;  Ponti *et al*., 2014) | Abandon of farms at risk  (Ponti *et al*., 2014) | Murcia(38.00°N); Cordoba 37.85°N (Iglesias *et al.,* 2010) |
| Decisions based on information on local disparities  (Iglesias *et al.,* 2010) | Euro- and non-European Mediterranean countries (Ponti *et al.,* 2014) |
| ***Extreme events*** | | | |
| Increases in  daily temperature at planting time  (Proietti and Regni, 2018) | Damage of whole aerial part of the olive grove (Proietti and Regni, 2018) | Planting during winter (in hot environments) (Proietti and Regni, 2018) | The lower latitudes of northern Mediterranean countries (France, Portugal) and/or the southern Mediterranean countries (Cyprus, Greece, Italy, Malta, Spain) (Proietti and Regni, 2018) |
| ***Cultivation areas*** | | | |
| Decrease in rainfall below minimum water requirements of olive trees (Ronchail *et al*., 2014) | Alteration of cultivation areas (Ronchail *et al*., 2014) | Shift in crops (Ronchail *et al*., 2014; Migliore *et al*., 2019) | Sierra Mágina (37.71° N ), Jaén Province, in N-E Andalusia (Spain) (Ronchail *et al.,* 2014) |
| ***Pests and diseases*** | | | |
| Uneven increase in temperature across regions  (*Ponti et al*., 2014) | Variable levels of incidence of pests and diseases (Ponti et al., 2014) | Adequate  treatments for  each species; Protection of  pests’ natural  enemies; Cultural  techniques; Choice of pest  resistant olive  Cultivars (Tombesi et al., 2007; Proietti and Regni, 2018) | Euro- and non-European Mediterranean countries (Ponti *et al.,* 2014) |

Table 2. Expected changes in climate, its impacts and key decisions affected for the olive cropping systems in

the northern areas and/or higher latitudes of southern areas

| Expected changes in climate | Expected impacts | Key decisions affected | Study location |
| --- | --- | --- | --- |
| *Extreme events* | | | |
| Decrease in annual temperature below the minimum supported by the olive trees (between 6/7°C and 8.3 °C; (Tombesi *et al.,* 2007; Ponti *et al.,* 2014) | Reduced suitability of cultivation areas  (Kaleci and Gündoğdu, 2016) | Settling olive orchards on hill slopes  (Tombesi *et al.,* 2007) | The northern Mediterranean countries (France, Portugal) and/or the higher latitudes of the southern Mediterranean countries (Cyprus, Greece, Italy, Malta, Spain) (Tombesi *et al.,* 2007) |
| Risk of late spring/ early autumn frost (Kaleci and Gündoğdu, 2016) | Settling olive orchards near large masses of water (Proietti and Regni, 2018) | Euro- and non-European Mediterranean countries (Ponti *et al.,* 2014) |
| Severe winds  (Kaleci and Gündoğdu, 2016) | Yenice (41.15° N) and Çan (40.02° N) districts, Çanakkale Province, Turkey (Kaleci and Gündoğdu, 2016) |
| Breaking of shoots and branches, dropping of flowers and fruits (Proietti and Regni, 2018) | The northern Mediterranean countries (France, Portugal) and/or the higher latitudes of the southern Mediterranean countries (Cyprus, Greece, Italy, Malta, Spain) (Proietti and Regni, 2018) |
| Increases in hail amount and frequency (Proietti and Regni, 2018) | Damaging of the inflorescences shoots, branches and fruits, increased risk of diseases (Proietti and Regni, 2018) | Pathogen treatments (Proietti and Regni, 2018) | The northern Mediterranean countries (France, Portugal) and/or the higher latitudes of the southern Mediterranean countries (Cyprus, Greece, Italy, Malta, Spain) (Proietti and Regni, 2018) |
| Decreases in daily temperature below the minimum supported by olive trees at planting time (Proietti and Regni, 2018) | Damage of whole aerial part of the olive grove (Proietti and Regni, 2018) | Rescheduled planting date (in cold environments) (Proietti and Regni, 2018) | The northern Mediterranean countries (France, Portugal) and/or the higher latitudes of the southern Mediterranean countries (Cyprus, Greece, Italy, Malta, Spain) (Tombesi *et al.,* 2007; Proietti and Regni, 2018) |
| Reduced fruit and oil quality (Tombesi *et al*., 2007) | Early harvesting (cold environments) (Proietti and Regni, 2018) |
| Increased risk of late autumn frosts (Tombesi *et al.,* 2007) | Irreversible damage of the non-  harvested fruits (“freezed” sensorial defect) (Proietti and Regni, 2018) | Earlier harvest date (Proietti and Regni, 2018) | The northern Mediterranean countries (France, Portugal) and/or the higher latitudes of the southern Mediterranean countries (Cyprus, Greece, Italy, Malta, Spain) (Tombesi *et al.,* 2007; Proietti and Regni, 2018) |

Table 3. Expected changes in climate, its impacts and key decisions affected in the grape cropping systems in

the southern, south-eastern areas and/or lower latitudes of northern areas

| Expected changes in climate | Expected impacts | Key decisions affected | Study location |
| --- | --- | --- | --- |
| ***Water stress*** | | | |
| Increasingly severe dry conditions (Malheiro *et al.*, 2010) | Reduced suitability of  red grape southern  areas  (Malheiro *et al.*, 2010;  Irimia *et al*., 2013) | Irrigation  (Resco *et al*., 2016) | European wine regions areas (Malheiro *et al.*, 2010) |
| Adjusted trellis height  (Resco *et al.,* 2016) | 56 wine region, Spain (Resco *et al*., 2016) |
| Management of soil conditions  (Resco *et al.,* 2016) | Globally (Mozell and Thach, 2014) |
| Introduction of winter crops  (Mozell and Thach, 2014) | Urlati-Dealu Mare (44.980N), in Romania (Irimia *et al.,* 2013) |
| Occurrence of prolonged water stress  (Bobeica *et al*., 2015) | Decrease in the ratio of di-/tri-hydroxylated anthocyanins  (colour of red cultivars)  (Bobeica *et al*., 2015) | Shallow tillage  (Neethling *et al*., 2016) | Navarra, Spain (42.490N) (Neethling *et al*., 2016) |
| Bordeaux (44.500N), France (Bobeica *et al.*, 2015) |
| Decreased thiol concentration  (aroma of white cultivars)  (Schultz, 2016) | Deficit irrigation techniques  (Mozell and Thach, 2014) | Globally (Mozell and Thach, 2014) |
| Occurrence of prolonged drought and water stress  (Vršič and Vodovnik, 2012) | Reduced yield-south-east Europe (Malheiro *et al.*, 2010; Vršič and Vodovnik, 2012) | Irrigation  (Malheiro *et al.,* 2010) | European wine regions (Malheiro *et al.* 2010) |
| Styria (47.150N), N-E Slovenia (Vršič and Vodovnik, 2012) |
| 35 wine regions across south, east, central Europe  (Fraga *et al.,* 2016) |
| Reduced yield - Mediterranean areas  (Fraga *et al.*, 2016;  Fraga and Santos, 2017; Ponti *et al*., 2018) | Southern latitudes in Italy, France, Australia (INRA, 2016) |
| Anti-transpirant combined  with defoliation treatments  (INRA, 2016) | Douro wine region (410N), Portugal (Fraga and Santos, 2017) |
| Settle vineyards on soils with  moderate soil-water-holding  capacity  (van Leeuwen and Darriet, 2016) | Globally (van Leeuwen and Darriet, 2016) |
| Algeria (280N); Bulgaria (42.450N); Egypt (260N); Greece (390N);Italy (430N); Morocco (320N); Portugal (38.420N); Spain (400N); Turkey (400N) (Ponti *et al.,* 2018) |
| ***Heat stress*** | | | |
| Increase in daily temperature above the maximum (300C) supported by grapevine during the growing season  (Teixeira *et al.,* 2013) | Reduced wine quality  (Lorenzo *et al*., 2013) | Adjusted training techniques  and row orientation, to reduce  sunlight exposure  (Mozell and Thach, 2014) | Rias Baixas (42.420N), in Spain (Lorenzo *et al*., 2013) |
| Reduced suitability of southern areas (Teixeira *et al*., 2013) | Globally (Mozell and Thach, 2014) |
| Alteration of phenological cycle  (Mozell and Thach, 2014;  Martínez-Lüscher *et al.*, 2016; Costa et al, 2019) | Settling the grapevine  plantation at thermally suitable  altitude on hillsides  (Neethling *et al.* , 2016) | Trsteno (42.430N) , in Croatia (Martínez-Lüscher *et al.*, 2016) |
| Navarra, Spain (42.490N) (Neethling *et al*., 2016)  Douro wine region (410N), Portugal (Costa et al, 2019) |
| Elevated CO2 levels +increase in daily temperature+dry conditions  (Mozell and Thach, 2014;; Martínez-Lüscher *et al.*, 2016) | Longer budburst–ﬂowering interphase (Fraga *et al.*, 2016;  Martínez-Lüscher *et al.*, 2016) | Increase vine load  (Mozell and Thach, 2014) | Globally (Mozell and Thach, 2014) |
| Trsteno (42.430N) , in Croatia (Martínez-Lüscher *et al.*, 2016) |
| Accelerated fruit development  and earlier grape ripening  (Salazar‑Parra *et al*., 2018) | 35 wine regions across south, east, central Europe (Fraga *et al.,* 2016) |
| Altered grape aroma and flavour  (Mozell and Thach, 2014) | Adjusted training system  (Gatti *et al*., 2015; van Leeuwen and Darriet, 2016) | Navarra ( 42.490N), Spain (Salazar‑Parra *et al.*, 2018) |
| Reduced berry size and weight  (Teixeira *et al*., 2013) | Early leaf removal  (Gatti *et al*., 2015) | Globally (van Leeuwen and Darriet, 2016) |
| ***Genetic management*** | | | |
| Decrease in summer rain and  drought occurrence  (Cook and Wolkovich, 2016) | Earlier maturation  (Cook and Wolkovich, 2016) | Use of drought resistant rootstocks  (van Leeuwen and Darriet, 2016) | Languedoc (43.400N), Southern Rhone Valley (43.190N), in France (Cook and Wolkovich, 2016) |
| Globally (van Leeuwen and Darriet, 2016) |
| Increase in daily temperature above the maximum (300C) supported by grapevine during the growing season  (Teixeira *et al.,* 2013) | Earlier phenological timing  (Martínez-Lüscher *et al.* , 2016) | Use of late-ripening clones  (Neethling *et al*., 2016) | Trsteno (42.430N) , in Croatia (Martínez-Lüscher *et al.*, 2016) |
| Navarra, Spain (42.490N) (Neethling *et al*., 2016) |
| ***Diseases and pests*** | | | |
| Increase in temperature and  humid conditions  (Bois *et al.,* 2017) | Overall increase in pest and diseases’ incidence (Mozell and Thach, 2014; Ponti *et al. ,* 2018) | Adequate phytosanitary  treatments  (Rossi *et al.,* 2014) | 626 wine growing regions worldwide Bois *et al.* (2017) |
| Increased incidence of downy mildew (Bois *et al.,* 2017) | Algeria (280N); Bulgaria (42.450N); Egypt (260N); Greece (390N);Italy (430N); Morocco (320N); Portugal (38.420N); Spain (400N); Turkey (400N) (Ponti *et al.,* 2018) |
| Increased incidence of grey mould  (Bois *et al.,* 2017) | Use of decision support tools (vite.net) (Rossi *et al*., 2014) | Globally (Mozell and Thach, 2014) |
| Increased incidence of fan leaf and leaf-roll associated viruses  (Bois *et al.,* 2017) | La Rioja (42.280N), in Spain, Alto Duoro (41.170N), in Portugal (Rossi *et al.,* 2014) |
| Increase in temperature and  reduced rainfall  (Malheiro *et al.,* 2010) | Increased incidence of European grapevine moth (central and eastern Europe)  (Ponti *et al.,* 2018) | Cultural practices  (Rossi *et al*., 2014) | European wine regions areas (Malheiro *et al.*, 2010) |
| Bulgaria (42.450N); Greece (390N);Turkey (400N)  (Ponti *et al.,* 2018) |
| Increased incidence of powdery  mildew  (Mozell and Thach, 2014) | Use of decision support tool (MODEM-IVM) (Horta SRL, 2012) | Globally (Mozell and Thach, 2014) |
| La Rioja (42.280N), in Spain, Alto Duoro (41.170N), in Portugal (Rossi *et al.,* 2014) |
| Southern latitudes in France, Italy, Portugal, and Spain (Horta SRL, 2012) |
| Increased levels of soil salinity  (Mozell and Thach, 2014) | Limited grapevine growth  (Københavns Universitet, 2013, Mozell and Thach, 2014;  Neethling *et al.*, 2016) | Irrigation  (Teixeira *et al*, 2013) | Globally (Mozell and Thach, 2014) |
| Mediterranean region (Københavns Universitet, 2013) |
| Navarra, Spain (42.490N) (Neethling *et al*., 2016) |

Table 4. Expected changes in climate, its impacts and key decisions affected in the grape cropping systems in

northern areas and/or higher latitudes of southern areas

| Expected changes in climate | Expected impacts | Key decisions affected | Study location |
| --- | --- | --- | --- |
| ***Temperature and solar insolation*** | | | |
| Increase in seasonal  temperature  (Teixeira *et al.*, 2013; Schultz, 2016) | Shift in grape cultivars (white)  (Koch and Oehl, 2018) | Use of warm climate clones (Resco *et al*., 2016; Koch and Oehl, 2018) | Hainfeld, Southern Palatinate, S-W Germany  (49 ° N) (Koch and Oehl, 2018) |
| Lower malic acid content (white cultivars)  (Mozell and Thach, 2014; Koch and Oehl, 2018) | Grafting over more adaptable grape varieties  (Mozell and Thach, 2014) | Globally (Mozell and Thach, 2014) |
| Petrol flavours in white grapes (Schultz, 2016) | Canopy management (van Leeuwen and Darriet, 2016) | 56 wine region, Spain (Resco *et al*., 2016) |
| Impeded phenolic metabolism  (Mozell and Thach, 2014) | Globally (van Leeuwen and Darriet, 2016) |
| Increase in temperature and  reduced rainfall  (Malheiro *et al.,* 2010) | Increased incidence of pests and pathogens originating from warmer climates  (Koch and Oehl, 2018) | Adequate phytosanitary  treatments (Rossi *et al.,* 2014) | European wine regions areas (Malheiro *et al.*, 2010) |
| Hainfeld, Southern Palatinate, S-W Germany  (49 ° N) (Koch and Oehl, 2018) |
| Cultural practices (Rossi *et al.,* 2014) | Colli Piacentini (44.590N), northern Italy (Rossi *et al.,* 2014) |
| Use of decision support tools (Rossi *et al.,* 2014; Horta SRL, 2012) | Northern latitudes in France, Italy, Portugal, and Spain (Horta SRL, 2012) |
| Increase in temperature+  elevated CO2 level+  drought (INRA, 2016) | Lower resistance of white cultivars (INRA, 2016) | Use of drought resistant rootstocks  (Neethling *et al*., 2016) | Northern latitudes in Italy, France, Australia (INRA, 2016) |
| Increased solar insolation (Irimia *et al*., 2013; Teixeira *et al.*, 2013; van Leeuwen and Darriet, 2016) | Aroma degradation and lower total acidity (white cultivars) (Gatti *et al*., 2015) | Canopy management (van Leeuwen and Darriet, 2016) | Husi (46.670N), Bucium-Iasi (46.250N), in Romania (Irimia *et al*., 2013) |
| Grafting over more adaptable grape varieties (Mozell and Thach, 2014) | Globally (Mozell and Thach, 2014) |
| Adapted training system (van Leeuwen and Darriet, 2016) | Colli Piacentini DOC area, Italy (44.300N) (Gatti *et al*., 2015) |
| (UV-B radiation) off-flavours in white grapes (van Leeuwen and Darriet, 2016) | Use of UV-B filtering nets (van Leeuwen and Darriet, 2016) | Piacenza (450N), Italy (Bobeica *et al.*, 2015) |
| Inhibition of anthocyanin accumulation and acylation (red cultivars) (Teixeira *et al.,* 2013; Bobeica *et al.*, 2015) | Canopy management (Teixeira *et al.,* 2013) | Globally (van Leeuwen and Darriet, 2016) |
| Adapted training system (van Leeuwen and Darriet, 2016) |
| Use of UV-B filtering nets (van Leeuwen and Darriet, 2016) |

Table 5. Expected changes in climate, its impacts and key decisions affected in the durum wheat cropping

systems

| Expected changes in climate | Expected impacts | Key decisions affected | Study location |
| --- | --- | --- | --- |
| ***Water and heat stress*** | | | |
| Decrease in summer and autumn rainfall in southern Europe (Rothamstead Research, 2009; INRA, 2015) | Decreased suitability of cultivation areas (Rothamstead Research, 2009; INRA, 2015) | Shift in crops (Ronchail *et al.,* 2014) | Italy, France, southern Australia (INRA, 2015) |
| Mediterranean region (Rothamstead Research, 2009) |
| Sierra Mágina (37.71° N ), Jaén Province, in N-E Andalusia (Spain) (Ronchail *et al*., 2014) |
| Occurrence of prolonged drought (INRA, 2015) | Reduced leaf elongation rate (INRA, 2015) | Use of drought resistant cultivars (Københavns Universitet, 2013) | Italy, France, southern Australia (INRA, 2015) |
| Occurrence of water deficit at flowering time (INRA, 2015) | Reduced agronomic output (INRA, 2015) | Mediterranean region (Københavns Universitet, 2013) |
| Increase in daily summer temperature and  soil moisture deficit (Sima *et al.,* 2015) | Occurrence of “shrivelling”  (Sima *et al.,* 2015) | Use of drought resistant varieties (Sima *et al.,* 2015) | Baragan plain (44.910N), Romania (Sima *et al.*, 2015) |
| Irrigation (Sima *et al.,* 2015) |
| Crop insurance (Sima *et al.,* 2015) |
| Occurrence of heat stress  (Moriondo *et al.,* 2016) | Variable yield  (Moriondo *et al.,* 2016) | Crop insurance  (Moriondo *et al.,* 2016) | Southern Spain, Midi- Pyrenees (Southern France), Tuscany (43.770N) and Apulia (40.790N), in Italy, Central Macedonia, and Southern Greece (Moriondo *et al.* 2016) |
| Occurrence of prolonged drought (Musolino *et al*., 2018) | Decrease in yield (Musolino *et al*., 2018; Kahiluoto et al., 2019; Roselló  et al., 2019) | Use of drought resistant varieties (Sima *et al.,* 2015) | Po river basin (43-460N), in Italy; Portugal, the Jucar river basin (38-400N), in Spain (Musolino *et al*., 2018) |
| Irrigation (Gonzalez-Zeas *et al.,* 2014) | Baragan plain (44.910N), Romania (Sima *et al.*, 2015) |
| Increased genetic diversity (Kahiluoto et al., 2019; Roselló  et al., 2019) | Italy, several locations (Kahiluoto et al., 2019) |
| Lleida (41.40°N), Spain (Roselló  et al., 2019) |
| Crop insurance (Gonzalez-Zeas *et al.,* 2014) | Southern Romania; Southern Portugal; Pescara (42.460N), in Italy; Almeria, (36.830N), in Spain (Gonzalez-Zeas *et al.*, 2014) |
| Uneven increase in temperature and  variable rainfall pattern in the long-term (Gonzalez-Zeas *et al.,* 2014) | Variable yield (Gonzalez-Zeas *et al.,* 2014) | Supplemental irrigation (Iglesias *et al.*, 2012; Gonzalez-Zeas *et al.,* 2014) | Southern Bulgaria, Romania, Slovenia, France, Portugal, Cyprus, Greece, Italy, Malta, Spain (Iglesias *et al.*, 2012) |
| Supplemental nitrogen fertilisation (Iglesias *et al.*, 2012) |
| Crop insurance  (Gonzalez-Zeas *et al.,* 2014) |
| Improve soil moisture retention capacity  (Gonzalez-Zeas *et al.,* 2014) | southern Romania; southern Portugal; Pescara (42.460N), in Italy; Almeria, (36.830N), in Spain (Gonzalez-Zeas *et al.*, 2014) |
| Shift crops from vulnerable areas  (Gonzalez-Zeas *et al.,* 2014) |
| Shift in sowing date  (Iglesias *et al.*, 2012) |
| Increase in daily summer temperature above 300C (Sima *et al.,* 2015) | Reduction in phenological cycle duration (Ventrella *et al.*, 2012) | Irrigation (Ventrella *et al.*, 2012) | Baragan plain (44.910N), Romania (Sima *et al.*, 2015) |
| Fertilization  (Ventrella *et al.*, 2012) | Apulia region (40.790N), Italy (Ventrella *et al.*, 2012) |
